1 **A general framework for identifying rare variant combinations in complex**  
2 **disorders**

3

4 Vijay Kumar Pounraja<sup>1,2</sup> and Santhosh Girirajan<sup>1,2,3</sup>

5

6 1. Department of Biochemistry and Molecular Biology, Pennsylvania State University,  
7 University Park, PA 16802

8 2. Bioinformatics and Genomics Graduate Program, The Huck Institute of the Life  
9 Sciences, University Park, PA 16802

10 3. Department of Anthropology, Pennsylvania State University, University Park, PA 16802

11

12

13

14

15 **Correspondence:**

16 Santhosh Girirajan

17 205A Life Sciences Building

18 Pennsylvania State University

19 University Park, PA 16802

20 E-mail: [sxg47@psu.edu](mailto:sxg47@psu.edu)

21

22 **ABSTRACT**

23 Statistical challenges due to rarity and combinatorial explosion resulting from exhaustive  
24 evaluation of rare variant combinations have limited the study of oligogenic etiology for  
25 complex disorders. We present *RareComb*, a framework that combines apriori algorithm and  
26 statistical inference to identify specific combinations of mutated genes associated with complex  
27 phenotypes. Using *RareComb* on 6,189 affected individuals, we identified 718 combinations of  
28 mutated genes significantly associated with intellectual disability (ID), and carriers of these  
29 combinations showed lower IQ than expected in a replication cohort of 1,878 individuals. These  
30 combinations were enriched for nervous system genes, showed complex inheritance patterns, and  
31 were depleted in unaffected siblings. We further identified oligogenic combinations associated  
32 with multiple comorbid phenotypes, including *COL28A1* and *MFSD2B* mutations for ID and  
33 schizophrenia. Our framework enables rare variant analysis in affected individuals lacking  
34 diagnosis based on *de novo* mutations, and provides a paradigm for dissecting the genetic basis  
35 of complex disorders.

36

37

38

## 39 INTRODUCTION

40 Recent human population growth has led to a rapid increase in the load of rare variants affecting  
41 functionally important regions of the genome<sup>1-3</sup>. Thus, rare variants are collectively more  
42 abundant in the population compared to common variants, many of which confer significant risk  
43 for neurodevelopmental disorders such as autism and intellectual disability<sup>4</sup>. In fact, recent  
44 studies have directly implicated rare damaging mutations that are very recent or *de novo* in more  
45 than one hundred genes towards neurodevelopmental disorders<sup>5-7</sup>. The ability to establish robust  
46 associations between rare variants of high effect size and complex disease has made this class of  
47 variants the primary focus of recent studies. However, a much larger class of rare and variably  
48 expressive variants that are individually less deleterious but, in combination, exert large effects  
49 towards disease is often overlooked. Variants in this category are often transmitted across  
50 generations without adverse effects on their carriers until they encounter other similar variants  
51 that, when combined, lead to genetic interactions conferring a higher risk for disease than their  
52 individual risks<sup>8,9</sup>. While this phenomenon underpins oligogenic models proposed over the years,  
53 studies so far have not focused on detecting combinatorial effects of specific sets of rare variants  
54 towards disease phenotypes<sup>10-13</sup>.

55 Identifying the effects of specific combinations of rare variants towards disease etiology  
56 has been challenging for many reasons. *First*, combinations of rare variants are rarer, and  
57 extremely large cohorts are required to observe even a few recurrent instances of specific variant  
58 combinations<sup>14</sup>. Prior studies of oligogenic models for rare variants evaded this problem by  
59 aggregating variant information at the sample level and comparing the overall burden of rare  
60 variants between groups of individuals (such as cases and controls)<sup>6,7,15,16</sup>. *Second*, the  
61 combinatorial explosion resulting from even a small set of rare variants makes it difficult to  
62 exhaustively evaluate all combinations. While sophisticated frameworks such as network  
63 analysis and machine learning provide powerful tools to model the composite effects of  
64 thousands of variables on a complex system and predict emergent behaviors and quantitative  
65 outcomes, adapting them to exhaustively search and delineate the effects of specific  
66 combinations of variables is daunting<sup>17,18</sup>. Furthermore, incorporating an efficient search tool  
67 into these frameworks and extending them to detect higher-order combinatorial effects would be  
68 nearly impossible. *Third*, even when all combinations of rare variants could be exhaustively  
69 evaluated within a large cohort, there is a lack of methods that are sensitive enough to detect

70 small differences between comparison groups to establish statistical significance. Therefore, an  
71 alternate approach that is highly flexible, scalable, and sensitive is necessary to address  
72 computational and statistical challenges associated with assessing rare variant combinations.

73 Here, we present a combinatorial framework called *RareComb* that couples the apriori  
74 algorithm<sup>19</sup> with binomial tests to overcome the limitations of data sparsity and high  
75 dimensionality, and systematically analyzes patterns of rare variants between groups of interest  
76 to identify specific combinations that are significantly associated with phenotypes<sup>20</sup>. We apply  
77 our analysis framework to a discovery cohort of 6,189 children with autism to identify genetic  
78 interactions involving pairs and triplets of mutated genes that are enriched in individuals with  
79 intellectual disability compared to individuals without intellectual disability. We demonstrate  
80 that the carriers of mutations in these specific gene pairs and triplets within an independent  
81 cohort of 1,878 children have significantly lower-than-expected intelligence quotient (IQ) scores.  
82 We also demonstrate the adaptability of our framework by leveraging it to identify mutated gene  
83 pairs and triplets significantly associated with two or more comorbid phenotypes among children  
84 with autism. Finally, we show how this generalizable and modular framework can be easily  
85 extended to identify higher order interactions beyond pairs and triplets of variants. Our stand-  
86 alone framework does not depend on *a priori* knowledge and can detect rare patterns from high-  
87 dimensional genetic data to generate interpretable results, making it readily applicable for  
88 analyzing cohorts of all size ranges to dissect the genetic basis of complex disorders.

89  
90  
91  
92  
93  
94  
95  
96

## 97 RESULTS

98 We hypothesized that two or more genes disrupted simultaneously by rare deleterious mutations  
99 contribute to a highly penetrant phenotype, as in an oligogenic model, or lead to a more severe  
100 phenotype than when each of the same genes are disrupted individually. We developed  
101 *RareComb* as a framework that combines data mining and statistical analysis to identify specific  
102 combinations (such as pairs, triplets, etc.) of rare variants that show significant associations with  
103 one or more phenotypes. *RareComb* analyzes an ' $n \times p$ ' sparse Boolean matrix with ' $p$ ' genes in  
104 ' $n$ ' individuals in three discrete steps (**Figure 1**). *First*, it applies the apriori algorithm  
105 independently in cases and controls to enumerate the frequency of all simultaneously mutated  
106 combinations that meet a pre-set minimum frequency threshold (**Supp. Figure 1**). *Second*, for  
107 each qualifying combination of variants, the method derives the expected frequency of  
108 simultaneously observing mutations in the constituent genes under the assumption of  
109 independence. It then independently quantifies the magnitude of deviation of the observed from  
110 the expected frequencies using binomial tests in cases and controls, and uses multiple-testing  
111 adjusted p-values to identify combinations that are statistically enriched in cases but not in  
112 controls. *Finally*, the method calculates effect sizes using Cohen's  $d$  and statistical power at 1%  
113 and 5% significance thresholds, to enable prioritization of a high confidence set of combinations  
114 that contribute to the phenotype in an oligogenic manner.

115

### 116 ***RareComb* identifies oligogenic combinations associated with ID and autism**

117 We sought to identify pairs and triplets of mutated genes that are significantly associated with  
118 intellectual disability (ID) phenotypes by analyzing 6,189 affected individuals from the  
119 SPARK<sup>21</sup> cohort for discovery and 1,878 affected individuals from the SSC<sup>22</sup> cohort for  
120 validation. To facilitate cross-cohort comparison, we identified 10,217 rare variants ( $MAF \leq 1\%$ )  
121 that were predicted to be deleterious by multiple methods and observed in both cohorts, and  
122 aggregated these variants to genes for the analysis (see **Methods**). We first categorized 1,215  
123 probands from the SPARK cohort diagnosed with ID as cases and 4,974 probands without ID as  
124 controls (**Figure 2A**). We then applied *RareComb* to the Boolean matrix and detected 25,602  
125 pairs involving 1,956 mutated genes in cases that were observed at a higher frequency than  
126 expected under the assumption of independence. Similarly, analyzing the controls using only the  
127 1,956 genes mutated in cases, *RareComb* identified 148 pairs of mutated genes that were

128 significantly enriched in cases but not in controls (**Supp. Table 1**), with moderate to high effect  
129 sizes (Cohen's  $d$ , 0.08-0.15) and adequate statistical power (70%-100% at 5% significance  
130 threshold) (**Supp. Figure 2**). These 148 gene pairs belonged to 142 probands, with 74%  
131 (105/142) of them carrying more than one significant pair. These observations suggest that an  
132 individual can carry multiple combinations, each contributing to the same phenotype at varying  
133 effect sizes (**Supp. Figure 3**).

134 We next sought to validate the association of these 148 mutated gene pairs towards  
135 intellectual disability. We hypothesized that if the association of the gene pairs with ID in the  
136 SPARK cohort were truly significant, carriers of mutations in those gene pairs would tend to  
137 have lower than average IQ scores in the independent SSC cohort. We found that 90 of the 148  
138 significant pairs identified in the SPARK cohort were observed in at least one proband in the  
139 SSC cohort. These 90 mutated gene pairs were carried by 91 unique probands, whose average  
140 full-scale IQ scores (average IQ=68.52) were lower than those of all ascertained probands in the  
141 SSC cohort (average IQ=86). To assess the significance of this result, we performed 10,000  
142 random draws of 91 probands from the SSC cohort to generate a simulated distribution of their  
143 average IQ scores. The average IQ of carriers of mutated gene pairs (average IQ=68.52) was  
144 significantly lower than the overall distribution of average IQ derived from simulations (average  
145 IQ ranged from 73 to 92; empirical  $p=0$ ) (**Figure 2B**). Furthermore, the average IQ of the 91  
146 SSC probands with both mutated genes was significantly lower than the average IQ of 1,252  
147 carriers of mutations in only one of the two genes (68.5 versus 82.8; Kolmogorov-Smirnov  $p =$   
148  $1.302 \times 10^{-16}$ ) (**Figure 2C**). When each of the 90 combinations was evaluated individually,  
149 carriers of mutations in both genes for 73% (66/90) of the combinations showed lower IQ than  
150 individuals with mutations in individual genes of the same combination, with 39/90 remaining  
151 significant after multiple testing correction (**Supp. Table 2; Supp. Figure 4**). These results  
152 provide evidence for synergistic effects of deleterious mutations within specific pairs of genes  
153 towards ID phenotypes.

154 We also applied *RareComb* to identify gene triplets associated with intellectual disability  
155 using the two cohorts and repeated the simulations to identify 1,593 significant combinations in  
156 the SPARK cohort. We selected 570 high-confidence triplets (with  $\geq 90\%$  statistical power at 5%  
157 significance threshold; **Supp. Table 3**) and found that 79 probands in the SSC cohort carried at  
158 least one of these deleterious triplets. The average IQ score of individuals carrying significant

159 gene triplets (average IQ score=73) was significantly lower than a distribution of average IQ  
160 scores from 10,000 draws of 79 SSC probands (average IQ score=82.5; min=72, max=94;  
161 empirical  $p=0.0011$ ; see **Supp. Figure 5**). This result reiterated that carriers of mutations in the  
162 significant gene combinations have lower IQ than a random group of probands. Our results also  
163 demonstrate the ability of the framework to identify higher order combinations of mutations that  
164 are significantly associated with specific phenotypes in individuals with complex disorders.

165

### 166 **Oligogenic combinations are enriched for specific inheritance patterns**

167 As individual variants can arise *de novo* or be inherited maternally or paternally, variants in pairs  
168 of genes can have six possible patterns of transmission (**Supp. Figure 6A**). We identified a total  
169 of 926 occurrences of the 148 pairs of mutated genes enriched among SPARK probands with ID  
170 ( $n=142$  probands), of which inheritance could be determined without ambiguity for 887  
171 instances. We found that one variant occurred *de novo* and the other variant was inherited from  
172 the mother in 244/887 instances (27.5%). Similarly, both mutated genes were inherited from the  
173 mother in 226/887 instances (25.4%) or occurred *de novo* in 221/887 instances (24.9%), while  
174 the remaining fraction (~22%) of variant pairs were either inherited from both parents, inherited  
175 from the father, or transmitted *de novo* and paternally. To assess the significance of our  
176 observations, we performed simulations to establish a baseline expectation of proportions for  
177 each category of parental inheritance pattern. We selected 926 pairs of genes in 1000 random  
178 draws of all possible mutated gene pairs among SPARK probands and calculated the fraction of  
179 instances that fell into each of the six transmission categories. The observed proportion was  
180 higher than the simulated proportions for instances when both variants occurred *de novo* (24.9%  
181 versus 17%, empirical  $p=0$ ) and when one variant was *de novo* and the other was inherited  
182 maternally (27.5% versus 25%,  $p=0.028$ ) (**Figure 3A**). We repeated this analysis for 7,596  
183 children affected with autism in the SPARK cohort compared to 11,740 unaffected parents and  
184 identified 110 gene pairs significantly associated with autism (**Supp. Table 4**). Similar to the  
185 results obtained for the ID phenotype, we found that both variants of a gene pair were more  
186 likely to occur *de novo* (24% versus 18%, empirical  $p=0$ ) or one variant occurring *de novo* and  
187 the other inherited maternally (33% versus 26%,  $p=0$ ) than expected based on simulation studies  
188 (**Supp. Figure 7**). The enrichment of *de novo* or maternally inherited variants for significant  
189 gene pairs aligns with published reports that severely affected children tend to carry multiple *de*

190 *novo* mutations or inherit pathogenic rare variants from mildly affected or unaffected carrier  
191 mothers<sup>16,23,24</sup>.

192 We then assessed whether the mutated gene pairs associated with ID were also found in  
193 siblings of carrier probands. Restricting our analysis to families with unaffected siblings whose  
194 probands had mutations in ID-enriched gene pairs, we found that both variants were present in  
195 the corresponding sibling for only 53/219 (24.2%) instances of gene pairs, while 102/219  
196 (46.6%) had variants in only one of the two genes and 64/219 (29.2%) instances had no variants  
197 in either of the genes in the siblings (**Supp. Figure 6B**). Using simulations, we found a  
198 significantly higher proportion of instances with only one of the two variants present in siblings  
199 compared to the expected values (46.6% versus 38.5%,  $p=0.007$ ). Furthermore, the proportion of  
200 observed instances with neither of the variants present in siblings (29.2% versus 33.1%,  
201 empirical  $p=0.098$ ) or both variants present in siblings (24.2% versus 28.4%,  $p=0.079$ ) was  
202 lower than expected (**Figure 3B**). The observation that only a small fraction of unaffected  
203 siblings carried both mutated gene pairs suggests a strong association of these gene pairs with ID  
204 phenotypes. These results suggest that mutations in pairs of genes significantly associated with a  
205 severe phenotype in probands are more likely to occur individually than simultaneously in  
206 unaffected siblings of the same family.

207

### 208 **Genes forming oligogenic combinations are distinct from canonical autism genes**

209 We expanded our analysis to include all 16,556 mutated genes in the SPARK cohort, as opposed  
210 to genes with mutations present in both the SPARK and SSC cohorts, and identified 52  
211 significant gene pairs (**Supp. Table 5**) and 230 triplets associated with the ID phenotype (with  
212  $\geq 90\%$  statistical power at 1% significance threshold; **Supp. Table 6**). Due to the expanded  
213 search space, the mutated gene pairs showed more significant p-values from the binomial tests  
214 when compared to those obtained from the more restricted set of variants overlapping both  
215 SPARK and SSC cohorts (**Supp. Figure 8**). Mutated genes within these combinations included  
216 several genes related to nervous system development, such as *NIN*, *HDC*, *NGF*, and *BRD8*.  
217 Furthermore, 5/52 pairs and 59/230 triplets contained at least one gene associated with autism in  
218 the SFARI database, including *FGFR1*, associated with multiple disorders including Kallmann  
219 syndrome<sup>25</sup> and Pfeiffer syndrome<sup>26</sup>; *RELN*, associated with temporal lobe epilepsy<sup>27</sup>; *SYNE1*,  
220 associated with spinocerebellar ataxia<sup>28,29</sup>; and *PNPLA7*, associated with autism and ID<sup>30</sup>. Thus,



221 most genes forming combinations are not involved in canonical autism or ID disorders,  
222 suggesting synergistic effects of these genes without prior association to disease.

223 We also performed gene ontology enrichment analysis for genes within the combinations  
224 and identified seven out of nine significantly enriched GO terms to be exclusively associated  
225 with nervous system-related functions, including synthesis and metabolism of catecholamines,  
226 axon/neuron regeneration, and neuron generation and differentiation (**Supp. Figure 9**)<sup>31</sup>.  
227 Furthermore, the differences in the type and specificity of GO terms enriched for significant  
228 pairs versus triplets were apparent, with genes forming pairs involved in nervous system function  
229 and genes forming triplets associated with both nervous system as well as other biological  
230 processes. We next assessed the enrichment and depletion of Human Phenotype Ontology (HPO)  
231 terms for genes forming significant pairs towards ID phenotypes<sup>32</sup>. *First*, we calculated the  
232 fraction of all 4,484 genes within the HPO database associated with each HPO term. *For*  
233 *example*, 30% (1,366/4,484) of all genes in HPO were associated with ID. We compared these  
234 expected values calculated for each HPO term with the corresponding fractions observed within  
235 the 95 genes forming 52 ID-associated pairs using binomial tests. Interestingly, genes associated  
236 with HPO terms related to neurodevelopmental phenotypes, such as ID, global developmental  
237 delay, seizure, and microcephaly, were significantly depleted within the set of 95 genes forming  
238 gene pairs (**Supp. Table 7**). *Next*, we evaluated whether genes within each of the 52 significant  
239 pairs shared one or more common HPO phenotype or disease. Of the 52 pairs, only one pair  
240 (*DNASE1* & *MTR*) shared an HPO phenotype (“epilepsy”). This was significantly lower than the  
241 expected value obtained from the distribution of the number of shared HPO phenotypes between  
242 all possible pairs of genes in the HPO database (1/52, 1.9% ID gene pairs compared to 31.5% of  
243 all HPO gene pairs shared one HPO phenotype,  $p=2.2\times 10^{-16}$ ; one-sided binomial test) (**Supp.**  
244 **Figure 10; Supp. Table 8**). We note that the 4,484 genes within HPO are potentially biased  
245 towards well-studied disorders, making pairs of genes drawn from HPO more likely to share  
246 phenotypes than random pairs of genes from the genome. Overall, GO and HPO analyses show  
247 that genes forming oligogenic combinations are involved in neuronal processes but have not  
248 been previously connected to neurodevelopmental phenotypes, indicating the novelty of the  
249 associations between these genes and ID phenotypes.

250  
251

## 252 **Identifying variant combinations towards specific patterns of comorbid phenotypes**

253 We adapted our framework to identify significant associations of two or more genotypes with  
254 multiple comorbid phenotypes. To identify novel comorbid associations, we eliminated  
255 phenotypes that were highly correlated with each other, such as ADHD and reading disorder<sup>33</sup>.  
256 We analyzed variant profiles of 6,189 autism probands from the SPARK cohort with records of  
257 comorbid features, including 1,215 individuals with ID, 1,825 with anxiety and depression, and  
258 332 with schizophrenia features. We assessed for significant co-occurrences of two or more  
259 mutated genes with two or more of the above phenotypes (**Figure 4**). Using one-tailed binomial  
260 tests to compare the observed frequency of combinations of genotypes and phenotypes to the  
261 expected frequency, we first identified 169 significant associations between pairs of mutated  
262 genes and two comorbid phenotypes as well as 82 combinations of three mutated genes and two  
263 comorbid phenotypes (**Supp. Tables 9 & 10**). As some of these significant genotype-phenotype  
264 combinations can be confounded by high degree of co-occurrence of mutated genes, we next  
265 calculated genotype-only p-values using binomial tests for all significant genotype-phenotype  
266 associations. For 32/169 combinations of two mutated genes and two comorbid phenotypes and  
267 5/82 combinations of three mutated genes and two comorbid phenotypes, the composite  
268 genotype-phenotype p-values were significant while genotype-only p-values were not  
269 significant, suggesting stronger associations between these variant combinations and phenotypes.  
270 *For example*, even when variants in genes *COL28A1* and *MFSD2B* did not co-occur more  
271 frequently than expected under the assumption of independence, these mutated genes co-  
272 occurred more frequently than expected among probands with ID and schizophrenia phenotypes.  
273 Loss-of-function and rare missense mutations in *COL28A1* have been reported in individuals  
274 with autism<sup>34,35</sup>, and *MFSD2A*, a paralog of *MFSD2B*, has been directly implicated in an  
275 autosomal recessive disorder associated with progressive microcephaly, spasticity and brain  
276 imaging abnormalities<sup>36</sup>. Similarly, we found *ARVCF* and *FATI* to be significantly associated  
277 with ID and schizophrenia, with *ARVCF* mapping within the 22q11.2 DiGeorge syndrome  
278 region<sup>37</sup>, while rare *de novo* mutations in *FATI* being associated with autism and  
279 schizophrenia<sup>6,38</sup>. Finally, we found that the mutations in genes *ABCA4*, *DNAH10* and *MC1R*  
280 significantly co-occurred in individuals with ID and anxiety/depression phenotypes. These  
281 results demonstrate the utility of identifying higher-order associations between genotypes and  
282 phenotypes in complex disorders such as autism.

## 283 DISCUSSION

284 Current rare variant analysis strategies are geared towards either searching for individual variants  
285 of high effect size whose influence on the phenotype is evident, such as *de-novo* gene-disruptive  
286 mutations, or comparing rare variant burden to explain collective effects on phenotypes<sup>7,39,40</sup>.  
287 The wider space between these two extremes of the analysis spectrum that involves  
288 combinations of rare variants has largely remained understudied. Although digenic diseases and  
289 multi-hit models of complex diseases have been used to provide post-hoc explanations for an  
290 observed phenomenon, they are not equipped to serve as a framework to actively search and  
291 identify rare variant combinations that fit oligogenic models for specific phenotypes<sup>9,12,13</sup>. While  
292 machine learning has become the de-facto approach for disease outcome predictions, the lack of  
293 holy-grail predictors and reduced interpretability due to data sparsity makes it less fit to detect  
294 combinatorial effects<sup>17</sup>. In addition, the common practice of evaluating feature importance  
295 metrics of machine learning classifiers falls short of the objective to identify combinations of  
296 features that exert higher effect on the phenotype than evident from their independent effects<sup>17,18</sup>.  
297 Furthermore, prior studies to assess combinatorial effects have been inherently biased due to  
298 their need to minimize the search space by restricting the analysis to only a subset of genes  
299 chosen based on *a priori* knowledge<sup>41-43</sup>. Here, we provide a proof-of-concept analytical  
300 framework that remains agnostic to prior evidence and performs exhaustive searches to identify  
301 combinatorial effects among rare variants while retaining high granularity of data and  
302 interpretability of results.

303 We use our framework to identify gene pairs and triplets significantly associated with  
304 intellectual disability and show that several constituent genes are associated with nervous system  
305 processes. These mutated gene combinations are more likely to be inherited maternally or occur  
306 *de novo*, are depleted in unaffected siblings from the same family, and are less likely to involve  
307 canonical autism or ID genes, suggesting that genes forming significant combinations are less  
308 deleterious on their own but manifest effects only when combined with other similar genes  
309 carrying rare mutations. While previous studies have linked aggregate rare variant burden  
310 towards intellectual disability<sup>44,45</sup>, our results fine map the association to specific combinations  
311 of constituent genes contributing to the burden. We propose a novel paradigm for dissecting the  
312 complexity of genetic disorders, where an affected individual carries multiple combinations of  
313 rare variants, and each combination contributes to either the same phenotype or distinct

314 phenotypes at varying effect sizes (**Figure 5**). A limitation of our method is that it tends to be  
315 biased towards genes that are mutated frequently enough to be observed in a combination. This  
316 limitation can be addressed by fixing specific primary variants of interest irrespective of their  
317 frequency and screening for “second-hit” modifiers that significantly co-occur with the primary  
318 variant, such as the co-occurrence of *RBM8A* variants in distal 1q21.1 deletion carriers  
319 manifesting thrombocytopenia-absent-radius syndrome and *TBX6* variants in 16p11.2 deletion  
320 carriers with scoliosis<sup>46,47</sup>.

321 Our method is fast and scalable, allows for fine-tuning combinatorial searches based on  
322 frequency, statistical power, and multiple testing criteria, and can be adapted to enable  
323 computational approximations to further improve run time and assess higher-order combinations  
324 beyond triplets. While larger sample sizes are generally required for detecting smaller frequency  
325 differences, we note that our framework achieves reliable statistical power even with modest  
326 sample sizes, implying that our framework could be applied to exome sequencing studies of  
327 other neurodevelopmental disorders that have not been explored for combinatorial effects. This  
328 approach can also be used to address a variety of research questions involving rare event  
329 combinations, including searching for protective effects of rare variants where simultaneous  
330 mutations are enriched in controls but not in cases, and finding combinations that exhibit specific  
331 enrichment or depletion patterns in more than two phenotypic groups. In summary, we provide a  
332 conceptual framework and the necessary tools to identify the oligogenic basis for complex  
333 disorders such as autism and intellectual disability, which hitherto was restricted to the analysis  
334 of canonical disorders such as Hirschsprung disease<sup>48</sup> and Bardet-Biedl syndrome<sup>12</sup>.

335  
336

## 337 MATERIALS AND METHODS

338 We developed *RareComb* to address computational and statistical challenges associated with  
339 combinatorial analysis of rare variants. *RareComb* first uses the apriori algorithm to efficiently  
340 count the frequencies of co-occurring variant combinations. It then uses one-tailed binomial tests  
341 to compare the observed frequency of each variant combination to the expected frequency  
342 derived under the assumption of independence among the constituent variants within each  
343 combination (**Figure 1**). This method can be applied to identify variant combinations that are  
344 significantly enriched in cases but not in controls. In studies involving multiple comorbid  
345 phenotypes, this method can also be used to detect associations between specific combinations of  
346 variants and one or more (comorbid) phenotypes (see **Supplementary Note**). The general  
347 principles of our method, built using the basic axioms of probability theory, can be easily  
348 extended to a variety of problems involving rare higher-order combinations (**Supp. Figure 11**).

349

### 350 Identifying frequencies of rare variant combinations

351 *RareComb* utilizes the apriori algorithm to efficiently calculate frequencies of variant  
352 combinations from sparse Boolean matrices (of 0s and 1s) (**Supp. Figure 12A**). The apriori  
353 algorithm has been successfully applied to analyze consumer behavior, where identifying  
354 products frequently purchased together could benefit a company<sup>49,50</sup>. While an algorithm that is  
355 used to derive insights from patterns within highly frequent events (i.e. frequent itemset mining)  
356 might not seem like a good fit to analyze rare variant combinations, its ability to perform  
357 disciplined search based on both built-in and user-specified constraints makes it an ideal  
358 counting tool. *For example*, the apriori algorithm avoids enumerating each of the 50 million pairs  
359 or 167 billion triplets from just 10,000 variants, and instead prunes the search-space based on  
360 user-defined criteria such as minimum frequency threshold and size of combinations (pairs,  
361 triplets, etc.) (**Supp. Figure 12B**). *RareComb* applies an additional constraint to the algorithm to  
362 limit its search to co-occurring events, which further reduces the search space (see  
363 **Supplementary Note**). *For example*, when considering variants A and B, only the frequency of  
364 the presence of both variants (A=1 & B=1) is counted, and not absence of either or both variants  
365 (A=1 & B=0; A=0 & B=1; or A=0 & B=0).

366

367

## 368 **Statistical Inference**

369 *RareComb* utilizes the p-values of one-tailed binomial tests to establish the magnitude of  
370 enrichment for each rare variant combination (**Figure 1**). For each combination, *RareComb*  
371 formulates null and alternate hypotheses for the binomial test by considering the event of  
372 observing all constituent variants together within a group of individuals as success and all other  
373 possibilities as failure in a binomial trial:

$$374 \quad H_0 : \pi = \pi_0$$

$$375 \quad H_a : \pi > \pi_0$$

376 where,

377  $\pi$  = Probability of *observing* all constituent rare variants of a combination together within  
378 a cohort, i.e.,  $P(A=1 \ \& \ B=1)$

379  $\pi_0$  = *Expected* probability derived from the frequency of individual variants of a  
380 combination, under the assumption of independence, i.e.,  $P(A=1) * P(B=1)$ .

381 *RareComb* then compares the null binomial distribution derived using the sample size of the  
382 group ( $n$ ) and the expected probability ( $\pi_0$ ) (i.e.,  $X \sim \text{Binom}(n, p = \pi_0)$ ) with the observed  
383 probability ( $\pi$ ), and calculates the probability of observing rare variants occurring together at  
384 least as frequently as they were observed within the cohort (i.e. p-value).

385 In case-control analyses, this method is applied independently to each group, and the p-  
386 values between them are compared. The combinations exhibiting enrichment in both cases and  
387 controls, likely due to proximity of variants in linkage disequilibrium, are eliminated, following  
388 which the p-values in cases are adjusted for multiple-testing to identify statistically significant  
389 combinations that exhibit enrichment in cases but not in controls. Finally, the effect sizes are  
390 calculated using Cohen's d and the statistical power is measured using 2-sample 2-proportion  
391 tests, as additional metrics to prioritize the final set of significant rare variant combinations. In  
392 genotype-comorbid phenotype association analyses, the method is applied just once to the entire  
393 cohort, with multiple-testing adjusted p-values serving as a sufficient metric to identify high  
394 quality associations between genotypes and two or more co-occurring phenotypes.

395

## 396 **Statistical power and computational performance of the method**

397 We measured the relationship between sample size and statistical power for both binomial and 2-  
398 sample 2-proportion tests used in the framework. It took 1,356 samples for the binomial test to

399 achieve a statistical power of 80% to establish statistical enrichment between expected and  
400 observed co-occurrence frequencies of 0.1% and 0.5% (**Supp. Figure 13**). This number  
401 increased to 6,469 when the test needed to be more sensitive to compare frequencies of 0.3% and  
402 0.5%. Similarly, it took 7,840 samples for the 2-sample 2-proportion test to achieve 80% power  
403 to establish statistical difference between co-occurrence frequencies of 2% and 0.5% observed in  
404 two groups (**Supp. Figure 14**). The sample size requirement increased to 14,633 to differentiate  
405 frequencies of 1.5% and 0.5% at 80% statistical power. These results align with the known  
406 relationship between sample size and statistical power, and indicate that our method can be  
407 reliably applied to analyze reasonably modest-size cohorts.

408 We also measured the run times for the case-control analysis to identify significant pairs  
409 and triplets of mutated genes using simulated data of three discrete sizes of samples (5,000,  
410 10,000, and 50,000 individuals) and genes (5,000, 10,000, and 15,000 genes). The apriori  
411 algorithm was run on single-core CPUs with 256 GB memory and was constrained to analyze  
412 combinations observed in at least 0.15% of the samples. Given the memory-intensive nature of  
413 the apriori algorithm implemented in the ‘arules’ package, 256 GB was chosen to maintain  
414 uniformity<sup>51</sup>. However, smaller input files could be processed successfully using much less  
415 memory. As expected, the runtimes were proportional to the size of the combination (pairs  
416 versus triplets) and the number of input variables (**Supp. Figure 15**). While the increase in run  
417 time with the increase in sample size is apparent for pairs, lower runtimes observed with running  
418 50,000 samples compared to 5,000 samples for triplets can be attributed to stochasticity of the  
419 input data. Overall, the analysis of gene pairs took between one minute and 12 minutes while  
420 triplets took between two minutes and 150 minutes. Since several factors influence the runtime  
421 of the method, a trial-and-error approach to determine an optimal minimum frequency threshold  
422 for co-occurring events can help identify relevant combinations without resulting in insufficient  
423 memory due to combinatorial explosion.

424

## 425 **Samples**

426 We used whole exome sequencing data from 6,189 affected males from the Simons Foundation  
427 Powering Autism Research (SPARK)<sup>21</sup> and 1,878 affected males from 2,247 simplex families  
428 from the Simons Simplex Collection (SSC)<sup>52</sup> cohort from the Simons Foundation Autism  
429 Research Initiative (SFARI)<sup>53</sup>. We selected only male probands for our analysis to avoid any

430 confounding effect due to gender or ascertainment bias<sup>54,55</sup>. While diagnosis information for  
431 intellectual disability (ID), anxiety, attention deficit hyperactivity disorders (ADHD),  
432 schizophrenia, language and sleep disorders were encoded as binary variables for the SPARK  
433 samples, full-scale intelligence quotient (IQ) scores were available for the SSC cohort.

434

#### 435 **Data preparation and quality control**

436 Variant Call Format (VCF) files obtained from exome sequencing data were annotated using  
437 ANNOVAR<sup>56</sup> for rsID information and variant frequency using ExAC<sup>57</sup> and gnomAD<sup>58</sup>. To  
438 overcome the limitations of using a single method to predict pathogenicity, the effects of non-  
439 synonymous mutations were annotated using 11 prediction methods: SIFT<sup>59</sup>, Polyphen2<sup>60</sup>  
440 (HDIV), Polyphen2 (HVAR), LRT<sup>61</sup>, MutationTaster<sup>62</sup>, MutationAssessor<sup>63</sup>, FATHMM<sup>64</sup>,  
441 MetaSVM<sup>65</sup>, PROVEAN<sup>66</sup>, REVEL<sup>67</sup>, and CADD<sup>68</sup>. Briefly, all missense, stop-loss/gain, and  
442 start-loss/gain variants within exonic, 3', and 5' UTR regions with minor allele frequencies  $\leq 1\%$   
443 identified based on both ExAC and gnomAD databases were selected. Then, variants with allele  
444 depth of  $\geq 15$  and allele balance between 25% and 75% for heterozygous variants and  $> 90\%$  for  
445 homozygous variants were selected as high-quality variants. Deleteriousness of the variants were  
446 measured and reported differently by each prediction method. REVEL provided a score between  
447 0 and 1, with higher scores indicating higher level of deleteriousness, while Polyphen2 and  
448 MutationAssessor classified variants into one of three categories. *For example*, Polyphen2  
449 classified variants as 'Deleterious', 'Possibly damaging', or 'Tolerated', while MutationAssessor  
450 classified variants as 'High', 'Medium', or 'Low'. The other nine methods classified variants as  
451 either 'Deleterious' or 'Tolerated'. Pathogenicity reported by each tool was encoded as a binary  
452 variable, with the categories 'Possibly damaging' and 'Medium' encoded as 0.5. Thus, the  
453 composite pathogenicity score derived from the 10 tools could range between 0 and 10. Missense  
454 variants with a cumulative score of  $\geq 4$  and stop-loss/gain predicted as 'deleterious' either based  
455 on CADD score (CADD phred  $> 30$ ) or MutationTaster were considered deleterious for all  
456 analyses. Indels and other smaller structural variants were not considered, as their functional  
457 impact could not be easily assessed.

458

459

460



## 461 **Gene Ontology (GO) and Human Phenotype Ontology (HPO) enrichment analyses**

462 Gene Ontology term enrichment analyses were performed using the ‘Gene Ontology API’  
463 accessed using the ‘post’ command of the python package ‘requests’ (python version 3.7)<sup>31</sup>. All  
464 analyses were performed using parameters for *homo sapiens* (organism = ‘9606’) to identify  
465 biological processes enrichment (annotDataSet = ‘GO:0008150’) using binomial tests. HPO  
466 enrichment analyses were performed using data from the ‘genes\_to\_phenotype’ file obtained  
467 from the HPO website<sup>32</sup>. Since enrichment of phenotypes is not automatically evaluated by HPO,  
468 we used customized R scripts to derive baseline expectations that could be compared against the  
469 actual observations to determine significance using the p-values from binomial tests.

470

## 471 **Statistical analysis**

472 All statistical analyses were performed using R v3.6.1 (R Foundation for Statistical Computing,  
473 Vienna, Austria)<sup>69</sup> and Python (v3.7)<sup>70</sup>. All data-related plots were generated using the R  
474 package ggplot2<sup>71</sup>.

475

## 476 **Software Availability**

477 *RareComb* is available as an open-source (<https://github.com/girirajanlab/RareComb>) R package  
478 that can be downloaded from the Comprehensive R Archive Network (CRAN) repository<sup>72</sup>. It  
479 can also be installed into development environments via interfaces such as Rstudio<sup>73</sup> using the  
480 command `install.packages('RareComb')`. The tool provides several functionalities that allow  
481 users to run the types of analyses described in this manuscript. The functionalities are as follows:  
482 (1) Identify rare event combinations statistically enriched within a single group; (2) Identify rare  
483 event combinations statistically enriched in cases but not in controls; (3) Identify rare event  
484 combinations enriched in cases but depleted in controls; (4) Identify statistically enriched rare  
485 event combinations that include at least one element from an user-supplied list; and (5) Identify  
486 genotypes statistically enriched within individuals manifesting two or more comorbid  
487 phenotypes. Each functionality takes a Boolean matrix as input and provides a set of user-  
488 adjustable parameters to customize the analysis, and delivers the results in a tabular format as csv  
489 files. Detailed instructions on the available functionalities and parameters built into *RareComb*  
490 and their usage can be found on the GitHub page or CRAN website. A shiny app illustrating the  
491 ideas behind *RareComb* is available online at <https://girirajanlab.shinyapps.io/RareComb/><sup>74</sup>.

492 **DECLARATIONS**

493 **Ethics approval and consent to participate**

494 As these data were de-identified, all our samples were exempt from IRB review and conformed  
495 to the Helsinki Declaration. No other approvals were needed for the study.

496

497 **Consent for publication**

498 All authors agree and consent for publication of the manuscript.

499

500 **Competing interests**

501 The authors declare that no competing interests exist in relation to this work.

502

503 **Authors' contributions**

504 VK and SG conceived the project. VK performed the analyses, generated the plots/images, and  
505 wrote and revised the manuscript; SG supervised the research and wrote and revised the  
506 manuscript. All authors read and approved the final draft of the manuscript.

507

508 **Acknowledgements**

509 We thank Naomi Altman, Yifei Huang, Dajiang Liu, Matthew Jensen, and Corrine Smolen for  
510 constructive comments on the manuscript. This work was supported by R01-MH107431, R01-  
511 GM121907, Seed Grants program from the Institute of Computational and Data Sciences at Penn  
512 State, and resources from the Huck Institutes of the Life Sciences (to SG). The funding bodies  
513 had no role in data collection, analysis, and interpretation. The authors are grateful to all the  
514 families who participated in the SSC and SPARK consortia, as well as the principal  
515 investigators, clinical sites, and staff for the consortia. The authors appreciate obtaining access to  
516 genetic and phenotypic data for SPARK and SSC through the Simons Foundation Autism  
517 Research Initiative (SFARI) Base. Approved researchers can obtain the SSC and SPARK  
518 population datasets described in this study by applying at <https://base.sfari.org>.

519

520

521

## 522 References

- 523 1. Coventry, A. *et al.* Deep resequencing reveals excess rare recent variants consistent with  
524 explosive population growth. *Nat. Commun.* **1**, 131 (2010).
- 525 2. Keinan, A. & Clark, A. G. Recent explosive human population growth has resulted in an  
526 excess of rare genetic variants. *Science*. **336**, 740–743 (2012).
- 527 3. Tennessen, J. A. *et al.* Evolution and functional impact of rare coding variation from deep  
528 sequencing of human exomes. *Science*. **337**, 64–69 (2012).
- 529 4. McClellan, J. & King, M. C. Genetic heterogeneity in human disease. *Cell* **141**, 210–217  
530 (2010).
- 531 5. Wilfert, A. B. *et al.* Recent ultra-rare inherited variants implicate new autism candidate  
532 risk genes. *Nat. Genet.* **53**, 1125–1134 (2021).
- 533 6. Iossifov, I. *et al.* The contribution of de novo coding mutations to autism spectrum  
534 disorder. *Nature* **515**, 216–221 (2014).
- 535 7. Sebat, J. *et al.* Strong Association of De Novo Copy Number Mutations with Autism.  
536 *Science*. **316**, 445–449 (2007).
- 537 8. Badano, J. L. & Katsanis, N. Beyond mendel: An evolving view of human genetic disease  
538 transmission. *Nat. Rev. Genet.* **3**, 779–789 (2002).
- 539 9. Gifford, C. *et al.* Oligogenic inheritance of a human heart disease involving a genetic  
540 modifier. *Science*. **364**, 865–870 (2019).
- 541 10. Pizzo, L. *et al.* Rare variants in the genetic background modulate cognitive and  
542 developmental phenotypes in individuals carrying disease-associated variants. *Genet.*  
543 *Med.* **21**, 816–825 (2019).
- 544 11. Girirajan, S. *et al.* A recurrent 16p12.1 microdeletion supports a two-hit model for severe  
545 developmental delay. *Nat. Genet.* **42**, 203–209 (2010).
- 546 12. Badano, J. L. *et al.* Dissection of epistasis in oligogenic Bardet-Biedl syndrome. *Nature*  
547 **439**, 326–330 (2006).
- 548 13. Leblond, C. S. *et al.* Genetic and functional analyses of SHANK2 mutations suggest a  
549 multiple hit model of autism spectrum disorders. *PLoS Genet.* **8**, e1002521 (2012).
- 550 14. Uricchio, L. H., Zaitlen, N. A., Ye, C. J., Witte, J. S. & Hernandez, R. D. Selection and  
551 explosive growth alter genetic architecture and hamper the detection of causal rare  
552 variants. *Genome Res.* **26**, 863–873 (2016).

- 553 15. Halvorsen, M. *et al.* Increased burden of ultra-rare structural variants localizing to  
554 boundaries of topologically associated domains in schizophrenia. *Nat. Commun.* **11**, 1842  
555 (2020).
- 556 16. Krumm, N. *et al.* Excess of rare, inherited truncating mutations in autism. *Nat. Genet.* **47**,  
557 582–588 (2015).
- 558 17. Murdoch, W. J., Singh, C., Kumbier, K., Abbasi-Asl, R. & Yu, B. Definitions, methods,  
559 and applications in interpretable machine learning. *Proc. Natl. Acad. Sci. U. S. A.* **116**,  
560 22071–22080 (2019).
- 561 18. Molnar, C., Casalicchio, G. & Bischl, B. Interpretable Machine Learning – A Brief  
562 History, State-of-the-Art and Challenges. *Commun. Comput. Inf. Sci.* **1323**, 417–431  
563 (2020).
- 564 19. Agarwal, R. & Srikant, R. Fast algorithms for mining association rules. *Proc. 20th VLDB*  
565 *Conf.*
- 566 20. Agrawal, Rakesh; Ramakrishnan, S. Fast Algorithms for Mining Association Rules. *Proc.*  
567 *20th VLDB Conf.* 487–499 (1994).
- 568 21. The SPARK Consortium. SPARK: A US Cohort of 50,000 Families to Accelerate Autism  
569 Research. *Neuron* **97**, 488–493 (2018).
- 570 22. Fischbach, G. D. & Lord, C. The simons simplex collection: A resource for identification  
571 of autism genetic risk factors. *Neuron* **68**, 192–195 (2010).
- 572 23. Girirajan, S. *et al.* Phenotypic Heterogeneity of Genomic Disorders and Rare Copy-  
573 Number Variants. *N. Engl. J. Med.* **367**, 1321–1331 (2012).
- 574 24. Turner, T. N. *et al.* Genomic Patterns of De Novo Mutation in Simplex Autism. *Cell* **171**,  
575 710–722 (2017).
- 576 25. Dodé, C. *et al.* Loss-of-function mutations in FGFR1 cause autosomal dominant Kallmann  
577 syndrome. *Nat. Genet.* **33**, 463–465 (2003).
- 578 26. Schell, U. *et al.* Mutations in FGFR1 and FGFR2 cause familial and sporadic pfeiffer  
579 syndrome. *Hum. Mol. Genet.* **4**, 323–328 (1995).
- 580 27. Dazzo, E. *et al.* Heterozygous Reelin Mutations Cause Autosomal-Dominant Lateral  
581 Temporal Epilepsy. *Am. J. Hum. Genet.* **96**, 992–1000 (2015).
- 582 28. Yoshinaga, T. *et al.* A novel frameshift mutation of SYNE1 in a Japanese family with  
583 autosomal recessive cerebellar ataxia type 8. *Hum. Genome Var.* **4**, 17052 (2017).

- 584 29. Synofzik, M. *et al.* SYNE1 ataxia is a common recessive ataxia with major non-cerebellar  
585 features: A large multi-centre study. *Brain* **139**, 1378–1393 (2016).
- 586 30. Prasad, A. *et al.* A Discovery resource of rare copy number variations in individuals with  
587 autism spectrum disorder. *G3 Genes, Genomes, Genet.* **2**, 1665–1685 (2012).
- 588 31. Mi, H., Muruganujan, A., Ebert, D., Huang, X. & Thomas, D. PANTHER version 14 :  
589 more genomes , a new PANTHER GO-slim and improvements in enrichment analysis  
590 tools. *Nucleic Acids Res.* **47**, 419–426 (2019).
- 591 32. Köhler, S. *et al.* The human phenotype ontology in 2021. *Nucleic Acids Res.* **49**, D1207–  
592 D1217 (2021).
- 593 33. Gilger, J. W., Pennington, B. F. & DeFries, J. C. A Twin Study of the Etiology of  
594 Comorbidity: Attention-deficit Hyperactivity Disorder and Dyslexia. *J. Am. Acad. Child*  
595 *Adolesc. Psychiatry* **31**, 343–348 (1992).
- 596 34. Krumm, N. *et al.* Transmission disequilibrium of small CNVs in simplex autism. *Am. J.*  
597 *Hum. Genet.* **93**, 595–606 (2013).
- 598 35. Guo, H. *et al.* Genome-wide copy number variation analysis in a Chinese autism spectrum  
599 disorder cohort. *Sci. Rep.* **7**, 44155 (2017).
- 600 36. Guemez-Gamboa, A. *et al.* Inactivating mutations in MFSD2A, required for omega-3 fatty  
601 acid transport in brain, cause a lethal microcephaly syndrome. *Nat. Genet.* **47**, 809–813  
602 (2015).
- 603 37. Sanders, A. R. *et al.* Haplotypic association spanning the 22q11.21 genes COMT and  
604 ARVCF with schizophrenia. *Mol. Psychiatry* **10**, 353–365 (2005).
- 605 38. Kenny, E. M. *et al.* Excess of rare novel loss-of-function variants in synaptic genes in  
606 schizophrenia and autism spectrum disorders. *Mol. Psychiatry* **19**, 872–879 (2014).
- 607 39. Zheng, G. X. Y. *et al.* Haplotyping germline and cancer genomes with high-throughput  
608 linked-read sequencing. *Nat. Biotechnol.* **34**, 303–311 (2016).
- 609 40. Girirajan, S. *et al.* Relative burden of large CNVs on a range of neurodevelopmental  
610 phenotypes. *PLoS Genet.* **7**, e1002334 (2011).
- 611 41. Papadimitriou, S. *et al.* Predicting disease-causing variant combinations. *Proc. Natl. Acad.*  
612 *Sci. U. S. A.* **116**, 11878–11887 (2019).
- 613 42. Kerner, G. *et al.* A genome-wide case-only test for the detection of digenic inheritance in  
614 human exomes. *Proc. Natl. Acad. Sci. U. S. A.* **117**, 19367–19375 (2020).

- 615 43. Schaaf, C. P. *et al.* Oligogenic heterozygosity in individuals with high-functioning autism  
616 spectrum disorders. *Hum. Mol. Genet.* **20**, 3366–3375 (2011).
- 617 44. Singh, T. *et al.* The contribution of rare variants to risk of schizophrenia in individuals  
618 with and without intellectual disability. *Nat. Genet.* **49**, 1167–1173 (2017).
- 619 45. Fitzgerald, T. W. *et al.* Large-scale discovery of novel genetic causes of developmental  
620 disorders. *Nature* **519**, 223–228 (2015).
- 621 46. Albers, C. A. *et al.* Compound inheritance of a low-frequency regulatory SNP and a rare  
622 null mutation in exon-junction complex subunit RBM8A causes TAR syndrome. *Nat.*  
623 *Genet.* **44**, 435–439 (2012).
- 624 47. Yang, N. *et al.* TBX6 compound inheritance leads to congenital vertebral malformations  
625 in humans and mice. *Hum. Mol. Genet.* **28**, 539–547 (2019).
- 626 48. Gabriel, S. B. *et al.* Segregation at three loci explains familial and population risk in  
627 Hirschsprung disease. *Nat. Genet.* **31**, 89–93 (2002).
- 628 49. Brijs, T., Swinnen, G., Vanhoof, K. & Wets, G. Using association rules for product  
629 assortment decisions. *ACM* (1999). doi:10.1145/312129.312241
- 630 50. Glance, N. *et al.* Deriving marketing intelligence from online discussion. *Proc. ACM*  
631 *SIGKDD Int. Conf. Knowl. Discov. Data Min.* 419–428 (2005).  
632 doi:10.1145/1081870.1081919
- 633 51. Hahsler, M., Grun, B. & Hornik, K. arules – A Computational Environment for Mining  
634 Association Rules and Frequent Item Sets. *J. Stat. Softw.* **14**, 1–6 (2005).
- 635 52. Sanders, S. J. *et al.* Insights into Autism Spectrum Disorder Genomic Architecture and  
636 Biology from 71 Risk Loci. *Neuron* **87**, 1215–1233 (2015).
- 637 53. SFARI Base. <https://www.sfari.org/resource/sfari-base/>
- 638 54. Jacquemont, S. *et al.* A higher mutational burden in females supports a ‘female protective  
639 model’ in neurodevelopmental disorders. *Am. J. Hum. Genet.* **94**, 415–425 (2014).
- 640 55. Polyak, A., Rosenfeld, J. A. & Girirajan, S. An assessment of sex bias in  
641 neurodevelopmental disorders. *Genome Med.* **7**, 94 (2015).
- 642 56. Wang, K., Li, M. & Hakonarson, H. ANNOVAR: Functional annotation of genetic  
643 variants from high-throughput sequencing data. *Nucleic Acids Res.* **38**, e164 (2010).
- 644 57. Exome aggregation Consortium. Analysis of protein-coding genetic variation in 60,706  
645 humans. *Nature* **536**, 285–291 (2016).

- 646 58. Genome Aggregation Database Consortium. The mutational constraint spectrum  
647 quantified from variation in 141,456 humans. *Nature* **581**, 434–443 (2020).
- 648 59. Ng, P. C. & Henikoff, S. SIFT: Predicting amino acid changes that affect protein function.  
649 *Nucleic Acids Res.* **31**, 3812–4 (2003).
- 650 60. Adzhubei, I. A. *et al.* A method and server for predicting damaging missense mutations.  
651 *Nat. Methods* **7**, 248–249 (2010).
- 652 61. Chun, S. & Fay, J. C. Identification of deleterious mutations within three human genomes.  
653 *Genome Res.* **19**, 1553–1561 (2009).
- 654 62. Schwarz, J. M., Rödelberger, C., Schuelke, M. & Seelow, D. MutationTaster evaluates  
655 disease-causing potential of sequence alterations. *Nat. Methods* **7**, 575–576 (2010).
- 656 63. Reva, B., Antipin, Y. & Sander, C. Predicting the functional impact of protein mutations:  
657 Application to cancer genomics. *Nucleic Acids Res.* **39**, 37–43 (2011).
- 658 64. Shihab, H. A. *et al.* Predicting the Functional, Molecular, and Phenotypic Consequences  
659 of Amino Acid Substitutions using Hidden Markov Models. *Hum. Mutat.* **34**, 57–65  
660 (2013).
- 661 65. Kim, S., Jhong, J. H., Lee, J. & Koo, J. Y. Meta-analytic support vector machine for  
662 integrating multiple omics data. *BioData Min.* **10**, 2 (2017).
- 663 66. Choi, Y. & Chan, A. P. PROVEAN web server: A tool to predict the functional effect of  
664 amino acid substitutions and indels. *Bioinformatics* **31**, 2745–2747 (2015).
- 665 67. Ioannidis, N. M. *et al.* REVEL: An Ensemble Method for Predicting the Pathogenicity of  
666 Rare Missense Variants. *Am. J. Hum. Genet.* **99**, 877–885 (2016).
- 667 68. Rentzsch, P., Witten, D., Cooper, G. M., Shendure, J. & Kircher, M. CADD: Predicting  
668 the deleteriousness of variants throughout the human genome. *Nucleic Acids Res.* **47**,  
669 D886–D894 (2019).
- 670 69. R Core Team. R: A language and environment for statistical computing. (2019).
- 671 70. Van Rossum, Guido; Drake, F. L. Python 3 Reference Manual. (2009).
- 672 71. Wickham, H. *ggplot2: Elegant Graphics for Data Analysis*. (Springer-Verlag New York,  
673 2016).
- 674 72. CRAN Repository. Available at: [https://cran.r-](https://cran.r-project.org/web/packages/available_packages_by_name.html)  
675 [project.org/web/packages/available\\_packages\\_by\\_name.html](https://cran.r-project.org/web/packages/available_packages_by_name.html).
- 676 73. RStudio Team. RStudio: Integrated Development for R. (2020).

677 74. Chang, W., Cheng, J., Allaire, J., Xie, Y. & McPherson, J. shiny: Web Application  
678 Framework for R. (2020).

679

680

681

682

683

684

685

686

687

688

689

690

691

692

693

694

695

696

697

698

699

700

701

702

703

704

705

706

707



708 MAIN FIGURES

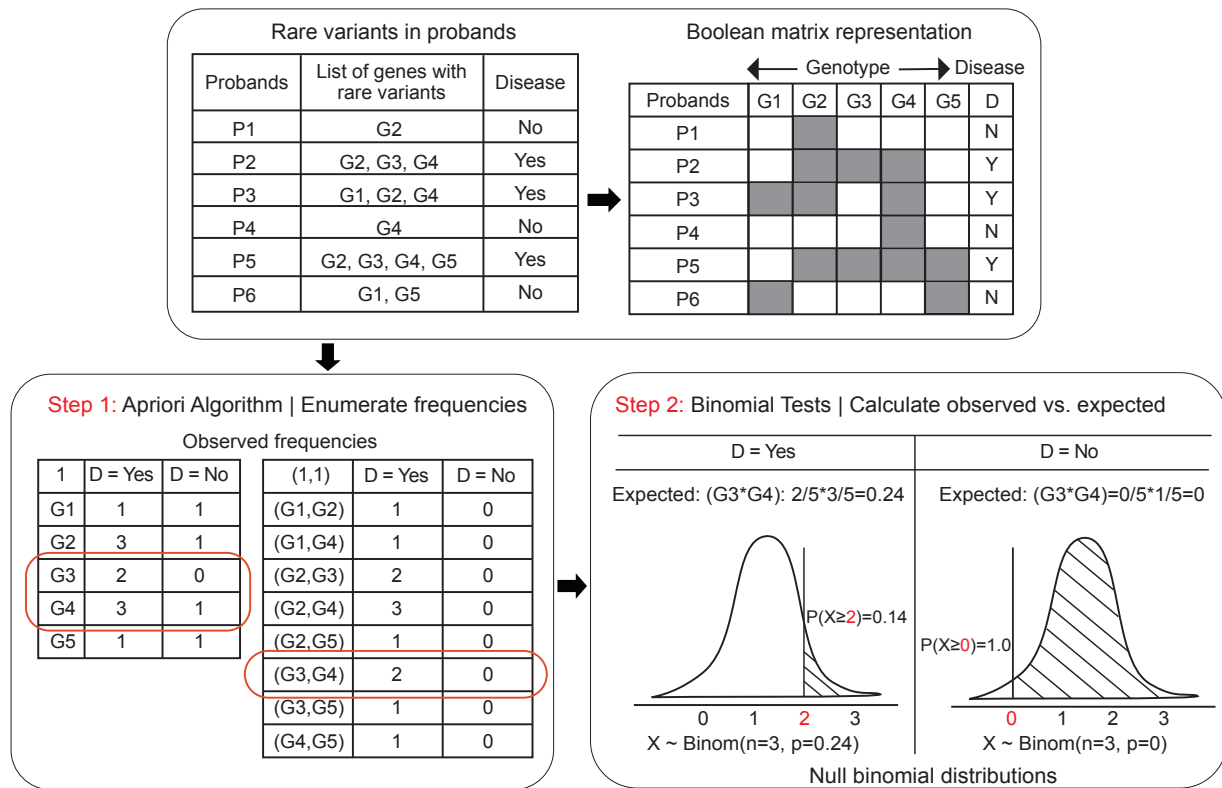

709

710 **Figure 1: Conceptual overview of combinatorial analyses using *RareComb*.** A Boolean  
 711 representation of genotype (mutated genes, G1, G2, etc) and disease status for probands (P1, P2,  
 712 etc) is shown. In *step 1*, the apriori algorithm is applied to the Boolean input matrix to calculate  
 713 the frequencies of individual (for example, G1) and simultaneous occurrences of events (G1 and  
 714 G2) that meet the user-specified criteria, including the size of combinations (pairs, triplets, etc.)  
 715 and minimum frequency threshold of simultaneous occurrences. In *step 2*, independently in case  
 716 and control groups, for each combination, the binomial test is applied to compare the observed  
 717 frequency of simultaneous occurrence of events with its corresponding null binomial distribution  
 718 of the expected frequencies calculated under the assumption of independence. Binomial test for  
 719 gene pair G3 and G4 is shown as an example.

720

721

722

723

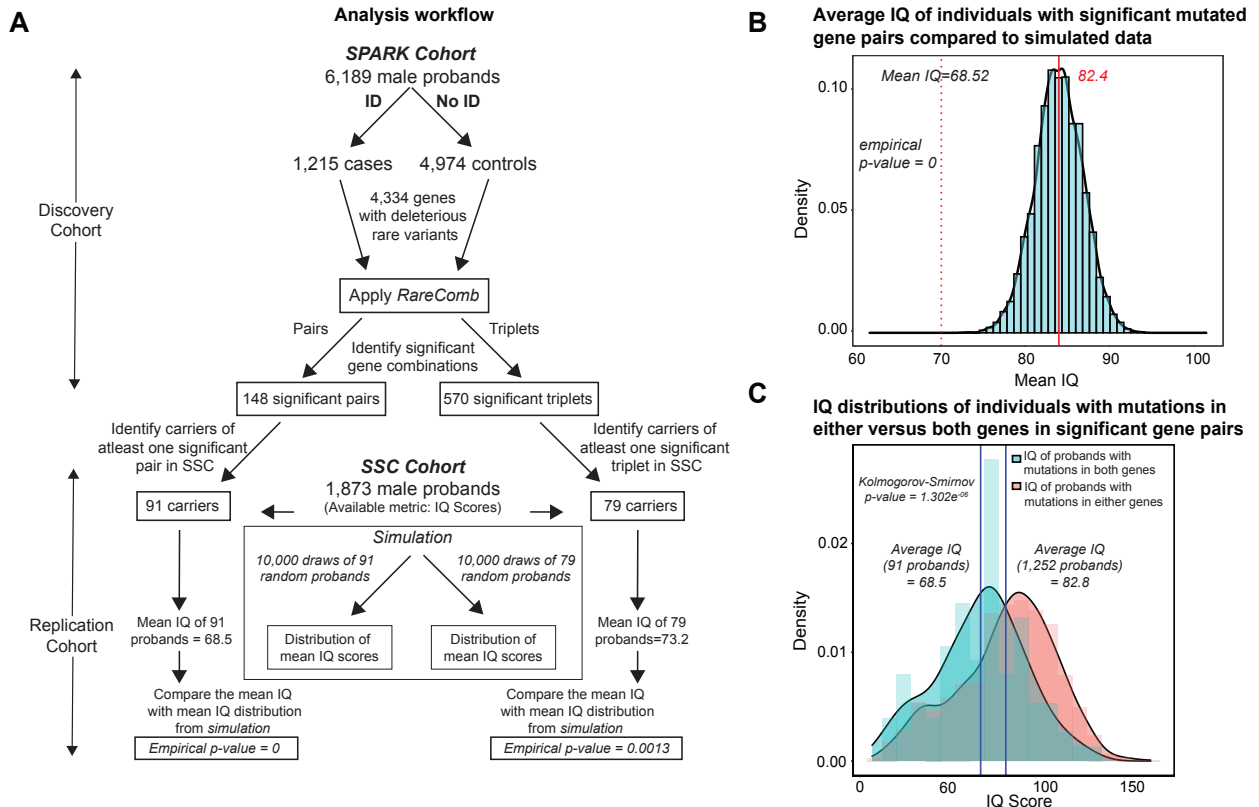

724

725 **Figure 2: Combinations of rare variants contributing to intellectual disability (ID)**

726 **phenotype. (A)** An outline of the approach used to identify and validate mutated gene pairs and

727 triplets enriched in probands with ID is shown. We tested whether mutated gene pairs identified

728 as significant in one cohort (SPARK) are also associated with severe phenotypes in an

729 independent cohort (SSC). To test this, we obtained the mean IQ score of individuals from the

730 SSC cohort carrying significant combinations identified from the SPARK cohort. Empirical p-

731 values were then calculated based on the deviation of the mean IQ from the distribution of mean

732 IQ scores obtained from 10,000 random draws in the simulation. **(B)** The mean IQ of individuals

733 with mutated gene pairs in the SSC cohort was significantly lower (empirical p-value=0) when

734 compared to the distribution of mean IQ scores obtained from the simulation. **(C)** Histogram

735 shows the distributions of IQ scores of SSC probands who carried mutations in either genes

736 versus both constituent genes of the significant gene pairs. The distributions were significantly

737 different from each other (p-value =  $1.302 \times 10^{-6}$ , Kolmogorov-Smirnov test).

738

739

740

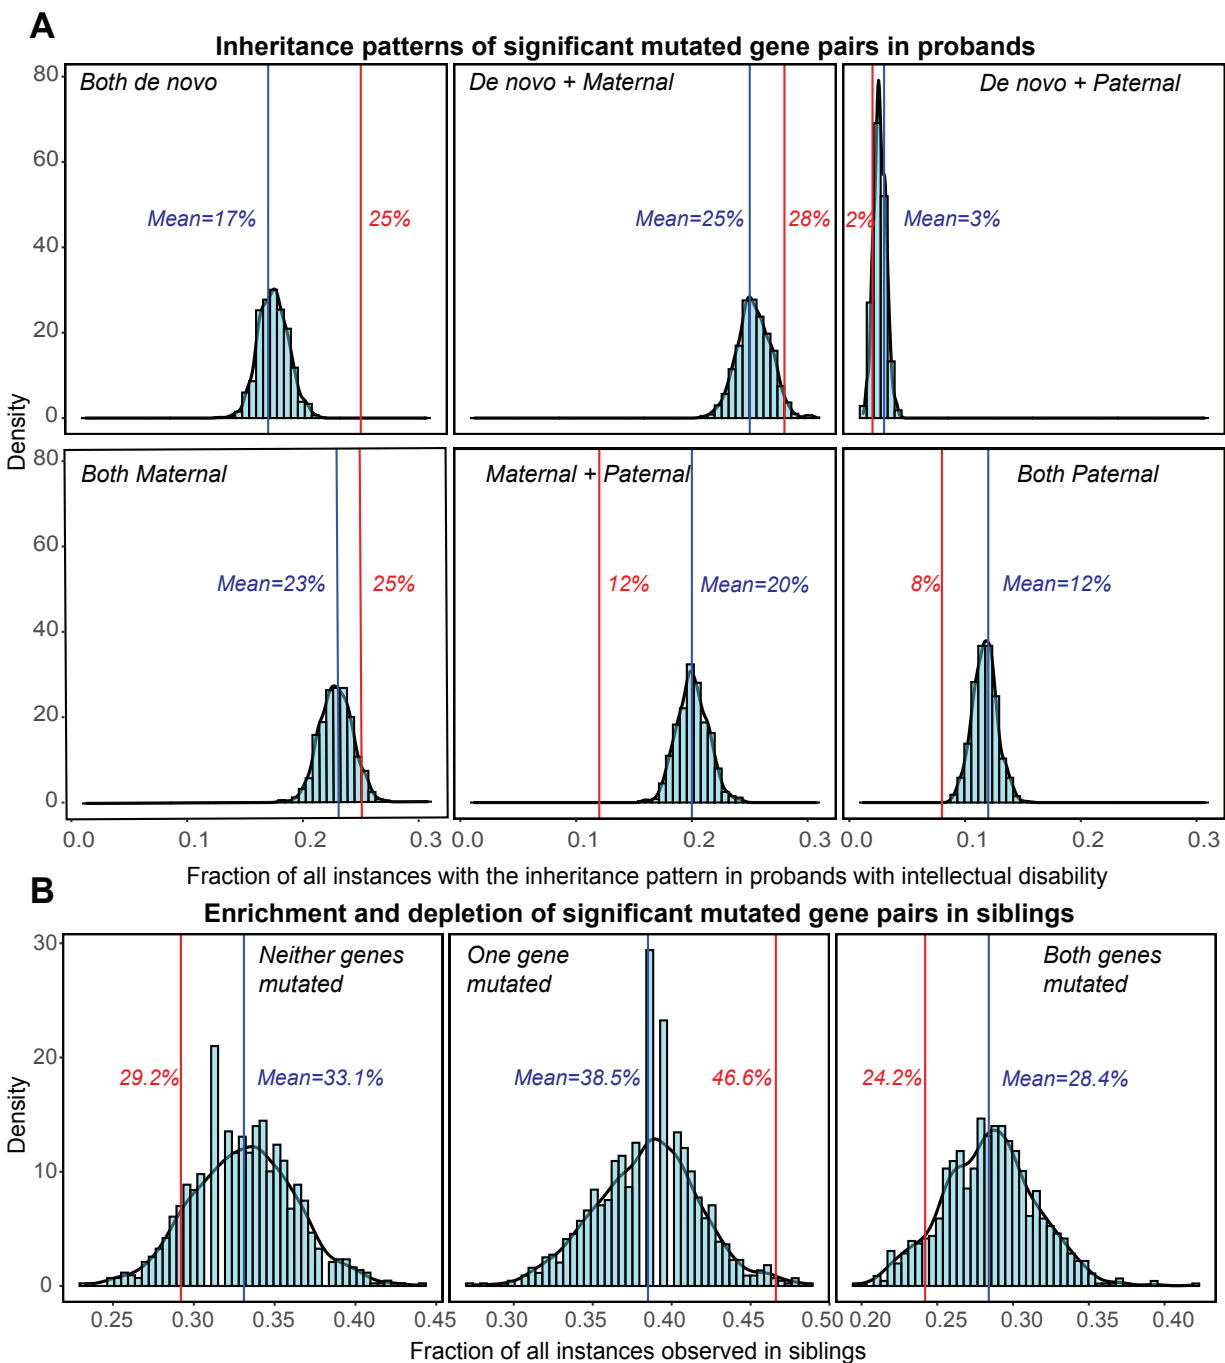

741  
 742 **Figure 3: Analysis of parental and sibling inheritance patterns of significant gene pairs**  
 743 **associated with ID.** (A) Fraction of all instances of significant gene pairs observed within each  
 744 of the six possible parental inheritance patterns (red) compared against 1,000 simulations is  
 745 shown (blue). During each simulation, random mutated gene pairs from the SSC cohort were  
 746 selected, the inheritance status of the mutations was identified, and the fraction of those instances

747 belonging to one of the six pre-defined categories was calculated. Comparing the observed  
748 fractions with the simulated fractions indicate statistical enrichment for two specific inheritance  
749 patterns: both variants being *de novo*, and one variant being *de novo* and the other transmitted  
750 from the mother. **(B)** Histograms show the carrier status of significant gene pairs in siblings of  
751 carrier probands (red) compared against 1,000 simulations (blue). Among significant pairs, both  
752 genes were mutated in only 24.2% of all siblings (compared to 28.4% in simulations), whereas  
753 one of the two genes was mutated in 46.6% of all siblings (compared to 38.5% in simulations).  
754 These results show that mutations are more likely to be observed in just one of the two genes  
755 within the gene pairs and are less likely to be observed simultaneously in siblings of carrier  
756 probands.

757

758

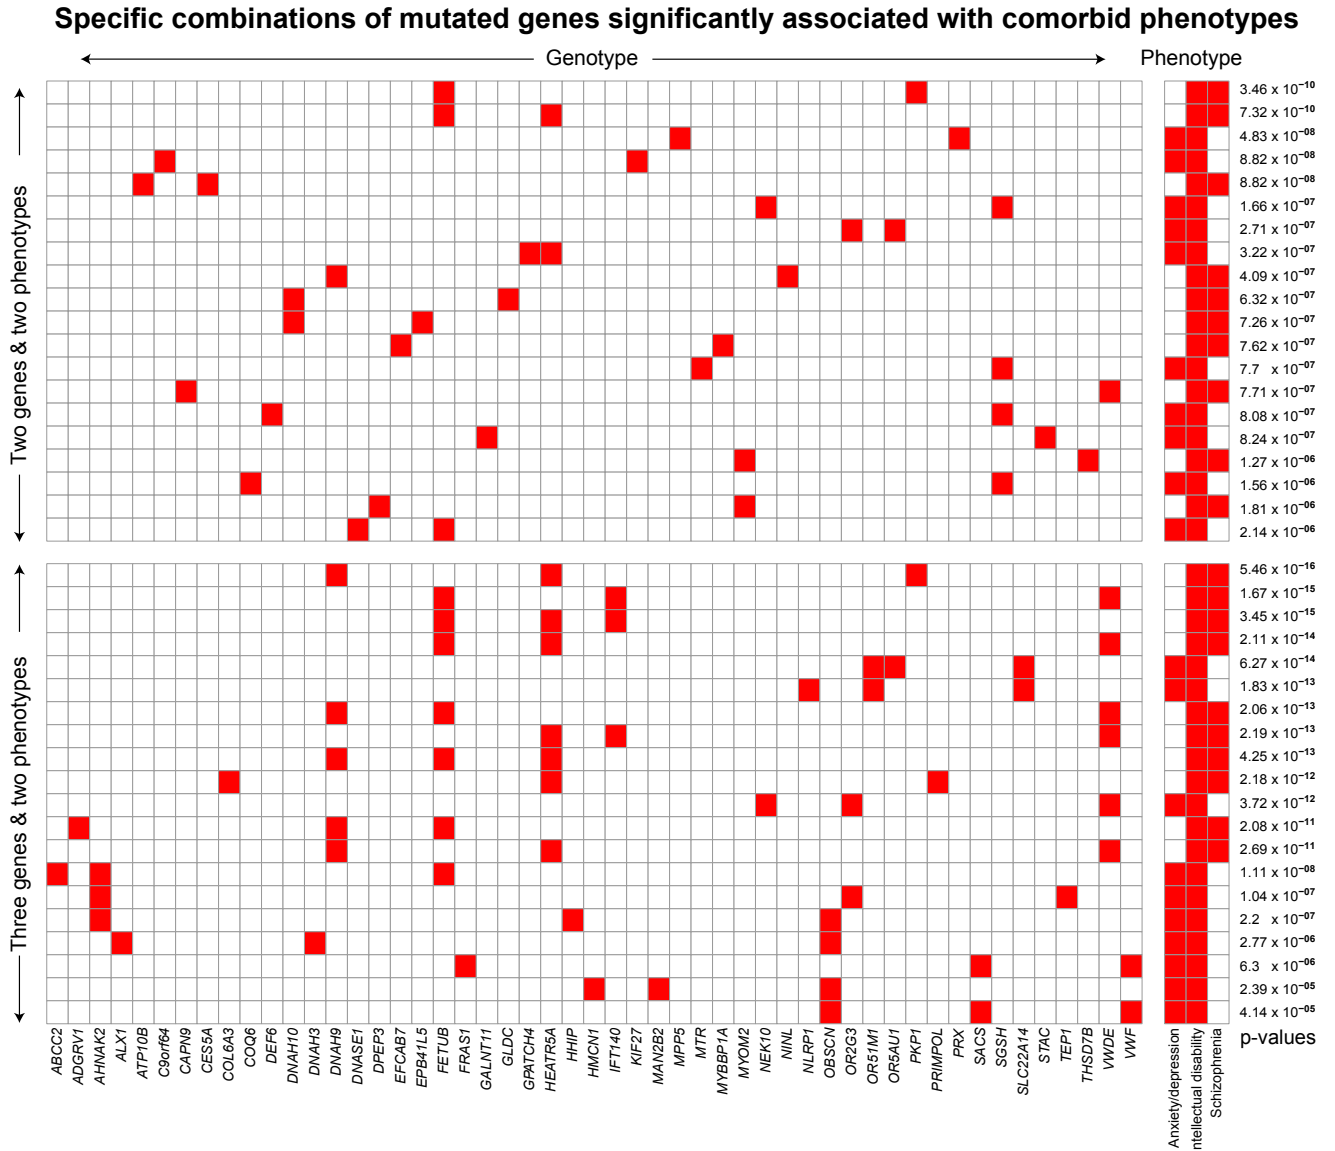

759

760 **Figure 4: Analysis of comorbid phenotypes using *RareComb*.** We analyzed the genotypes of  
 761 probands with anxiety/depression, ID, or schizophrenia. The heatmap shows combinations of  
 762 two or three mutated genes that were significantly enriched in individuals with specific patterns  
 763 of comorbid phenotypes compared to the expected frequency under the assumption of  
 764 independence.

765

766

767

768

769

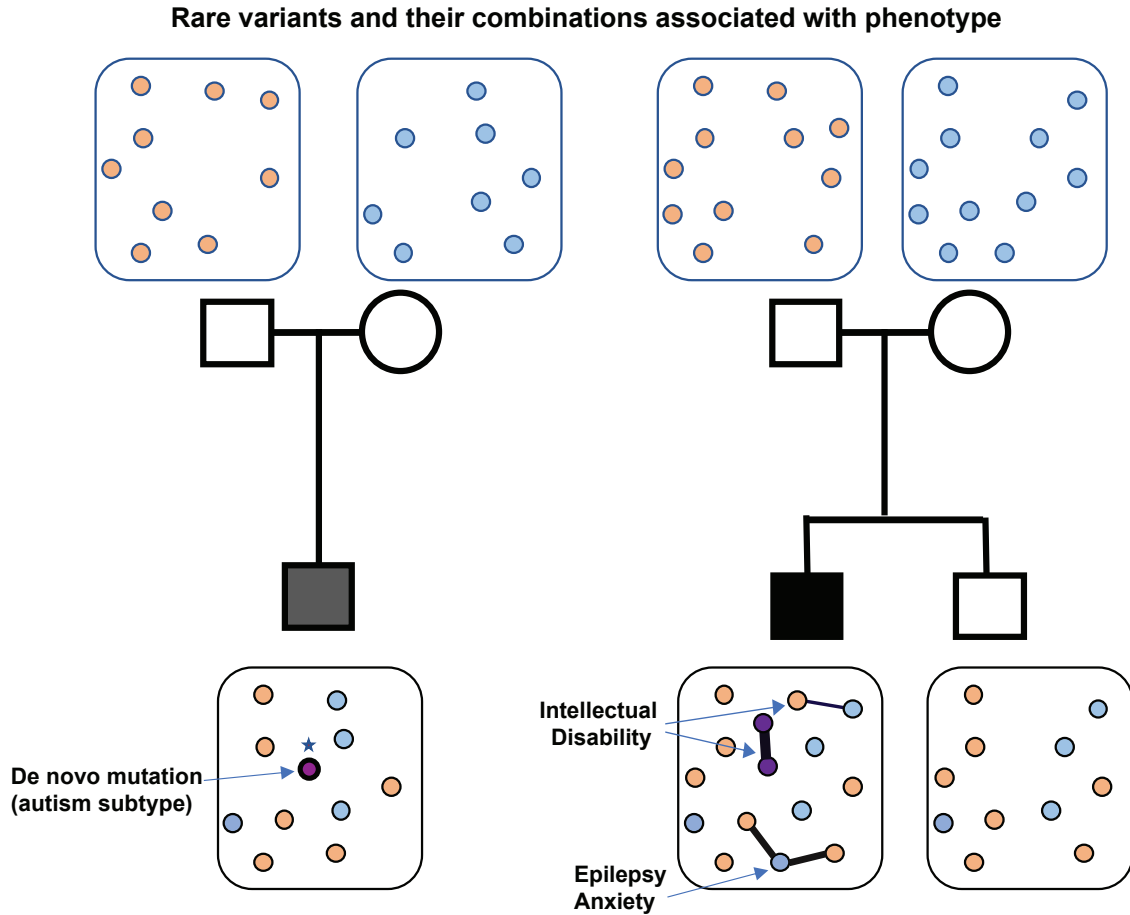

770

771 **Figure 5: Rare variant models for complex disorders.** The schematic shows two models for  
772 the genetic etiology of complex disorders. Circles represent rare variants present that are either  
773 *de novo* or inherited from a parent. On the left, individual high-effect *de novo* variants are  
774 strongly associated with a phenotype of interest. On the right, rare variants within an individual  
775 combine in multiple ways and contribute towards distinct phenotypes. The thickness of the  
776 connecting lines denotes effect sizes, and an affected individual can carry multiple oligogenic  
777 combinations of rare variants, each of which contributes to the same or distinct phenotypes. This  
778 extension of the oligogenic model enables further dissection of the genetic architecture of  
779 complex disorders.

780
